# Supplementary material
Source: publisher site journal article supplement (https://www.dovepress.com/article/83910)
Supplement: Supplementary file 1 [file get_supplementary_file.php]

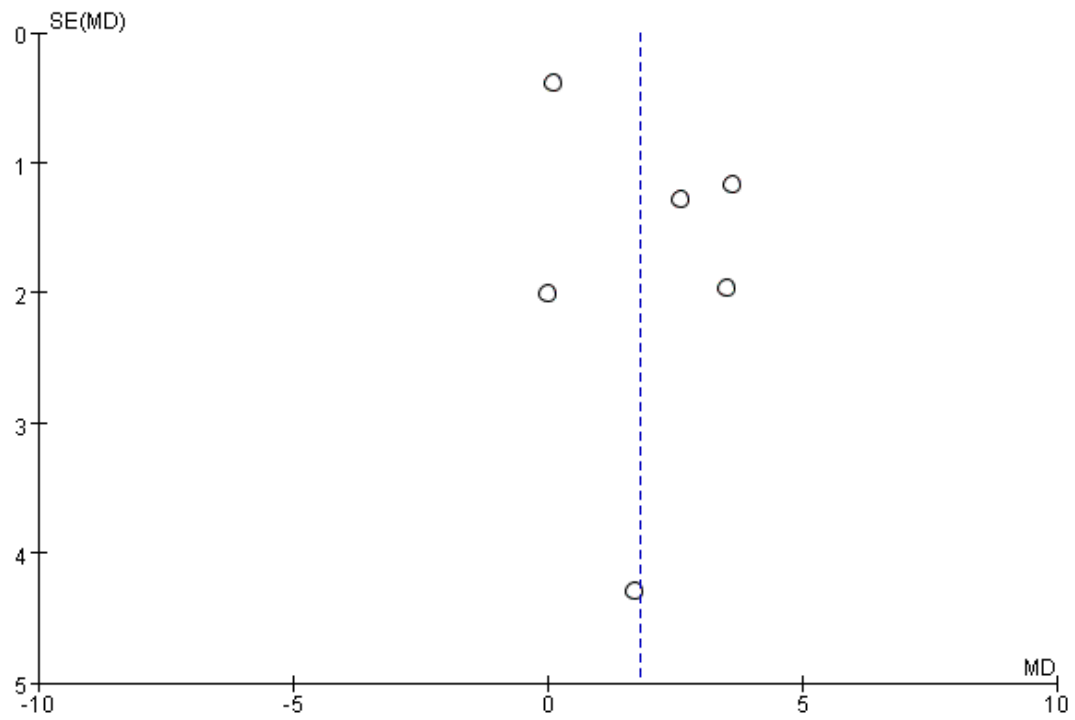

Supplementary Figure 1. Funnel plot of age in COPD patients with and without bronchiectasis

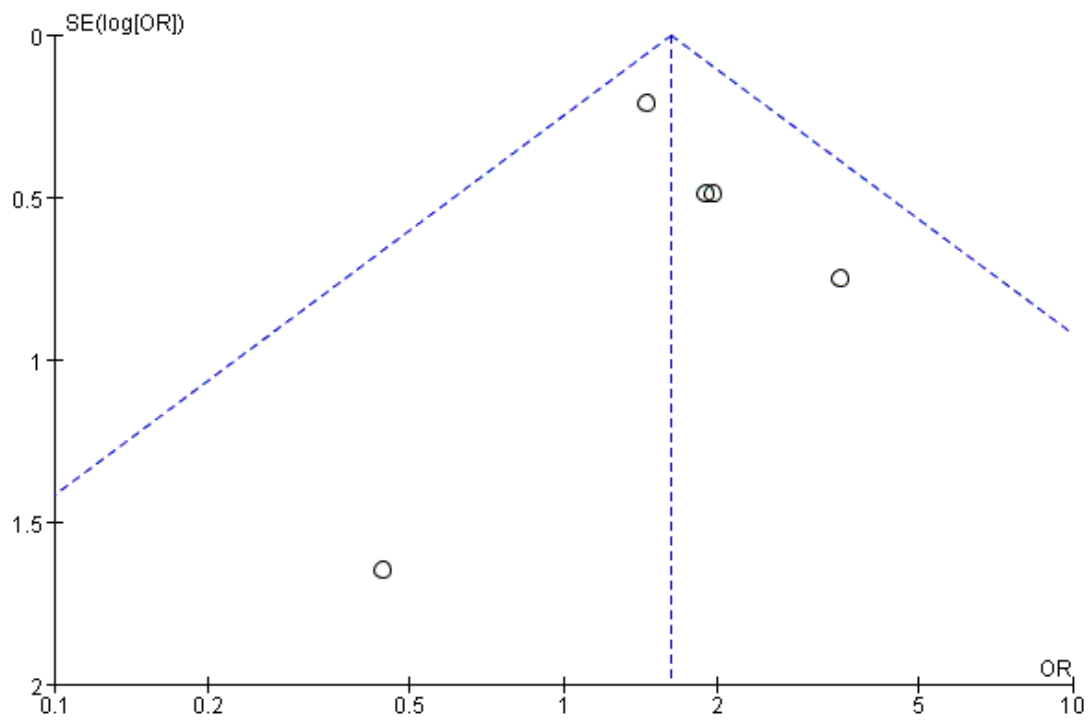

Supplementary Figure 2. Funnel plot of gender in COPD patients with and without bronchiectasis

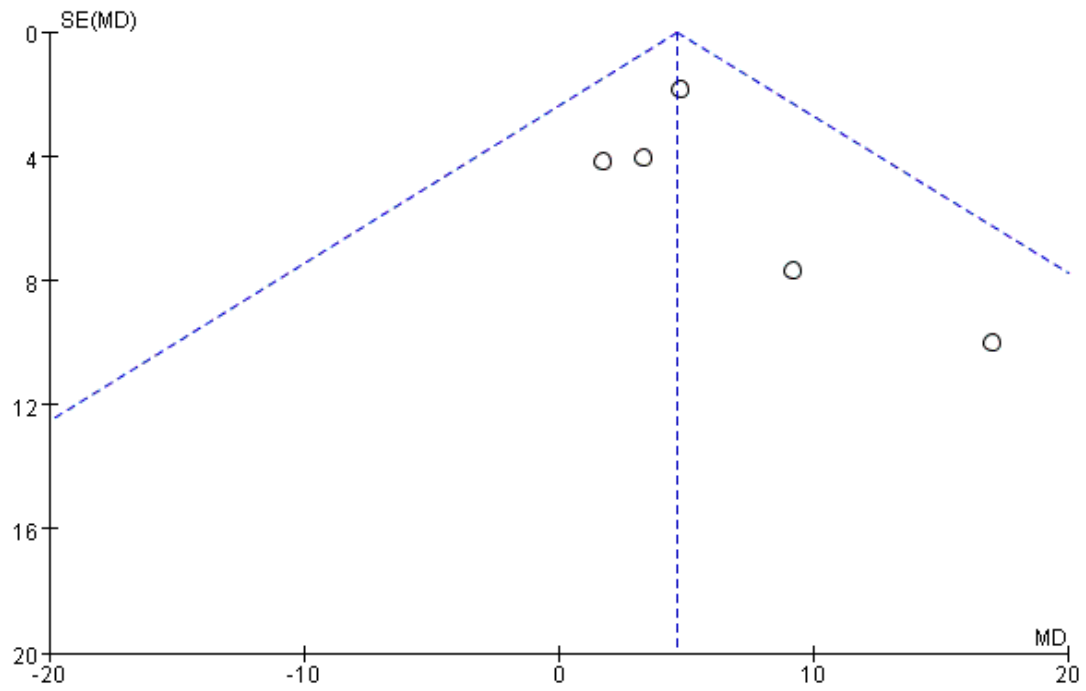

Supplementary Figure 3. Funnel plot of smoking history (pack-years) in COPD patients with and without bronchiectasis

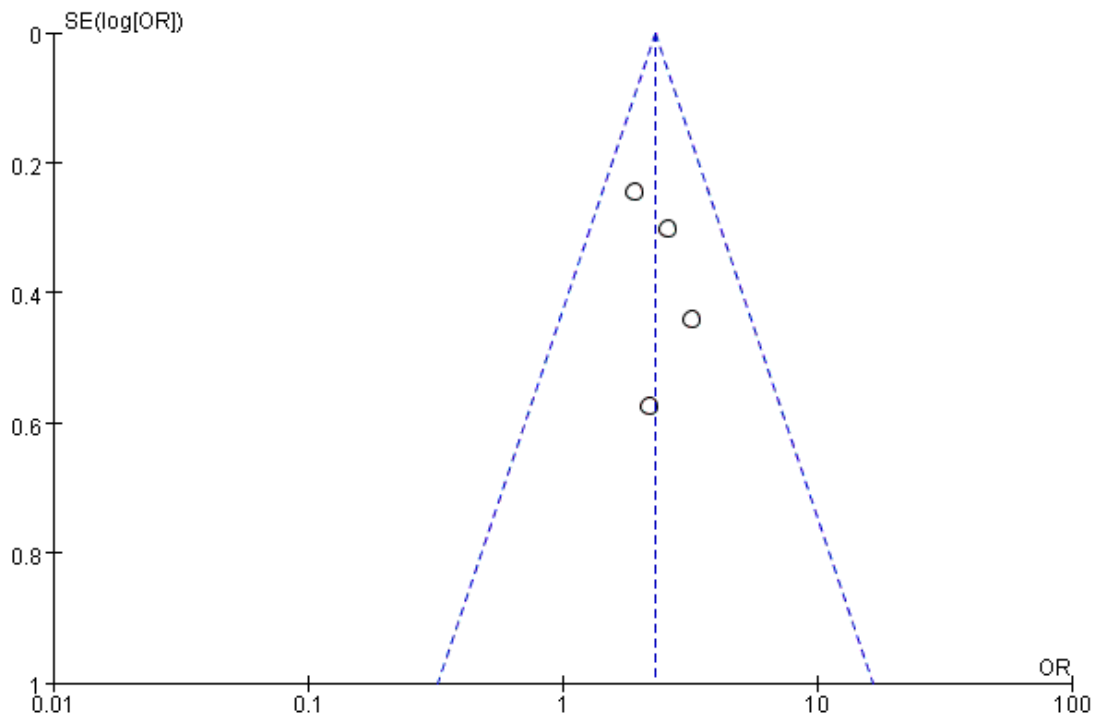

Supplementary Figure 4. Funnel plot of daily sputum production in COPD patients with and without bronchiectasis

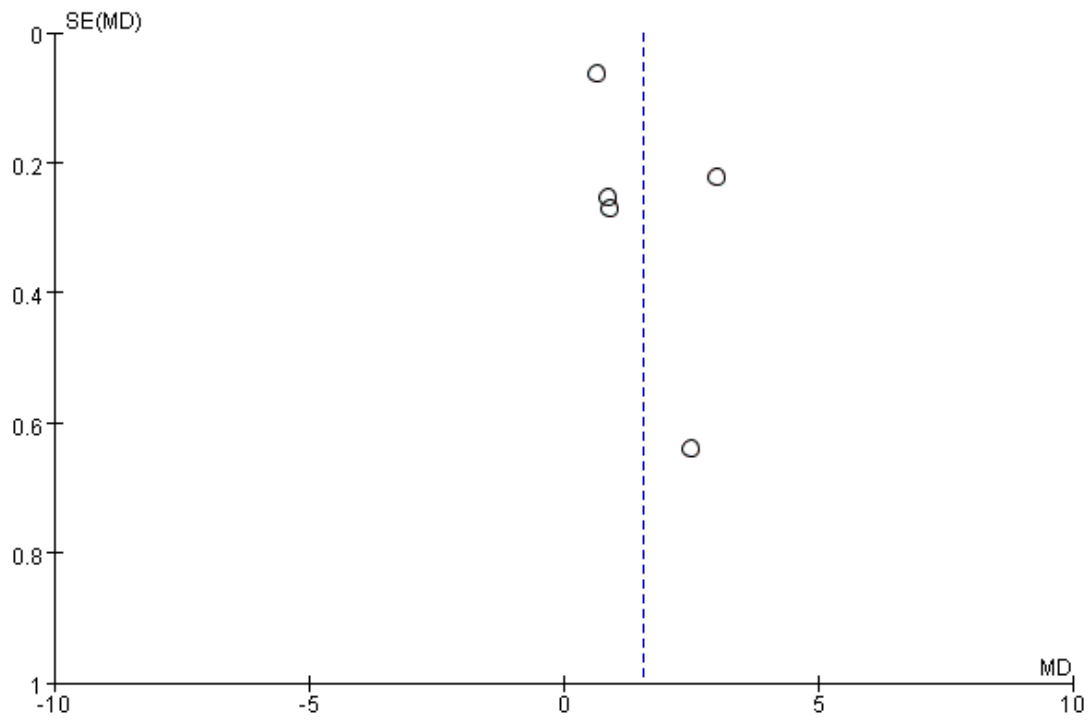

Supplementary Figure 5. Funnel plot of exacerbations in COPD patients with and without bronchiectasis

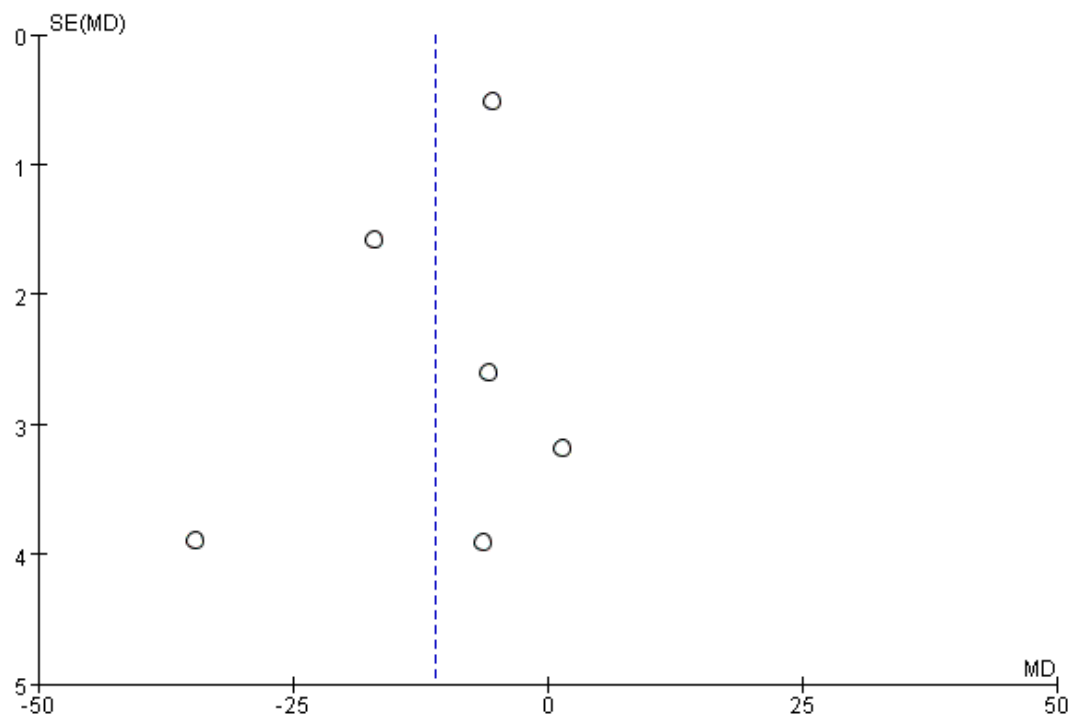

Supplementary Figure 6. Funnel plot of postbronchodilator FEV1 in COPD patients with and without bronchiectasis

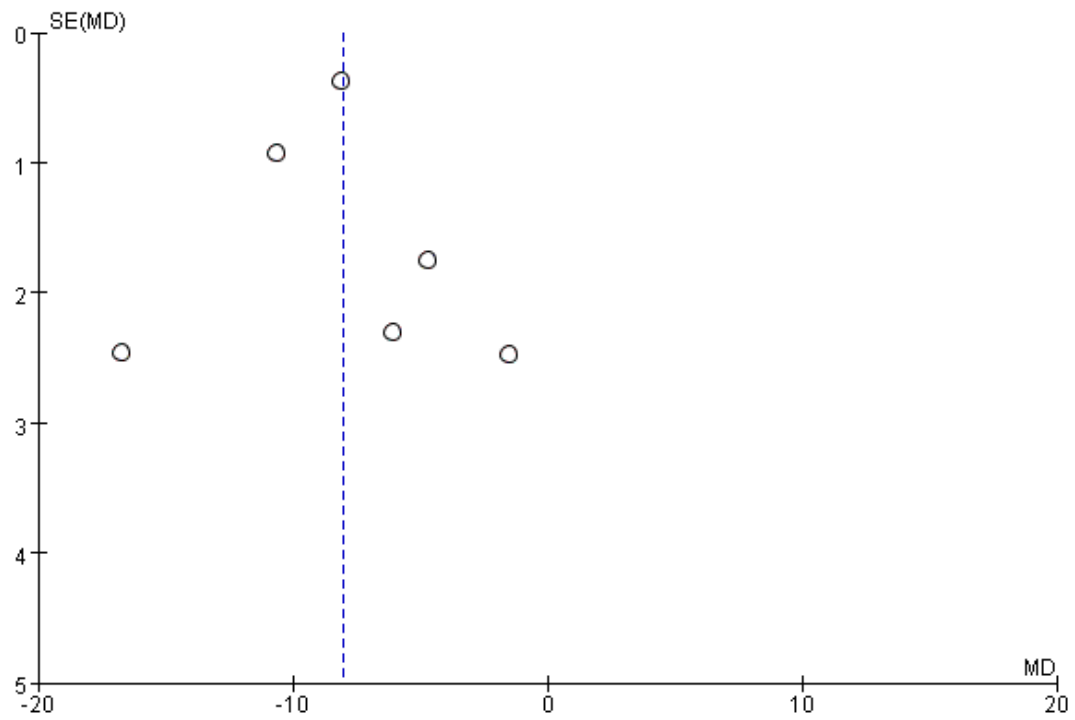

Supplementary Figure 7. Funnel plot of FEV1/FVC ratio in COPD patients with and without bronchiectasis

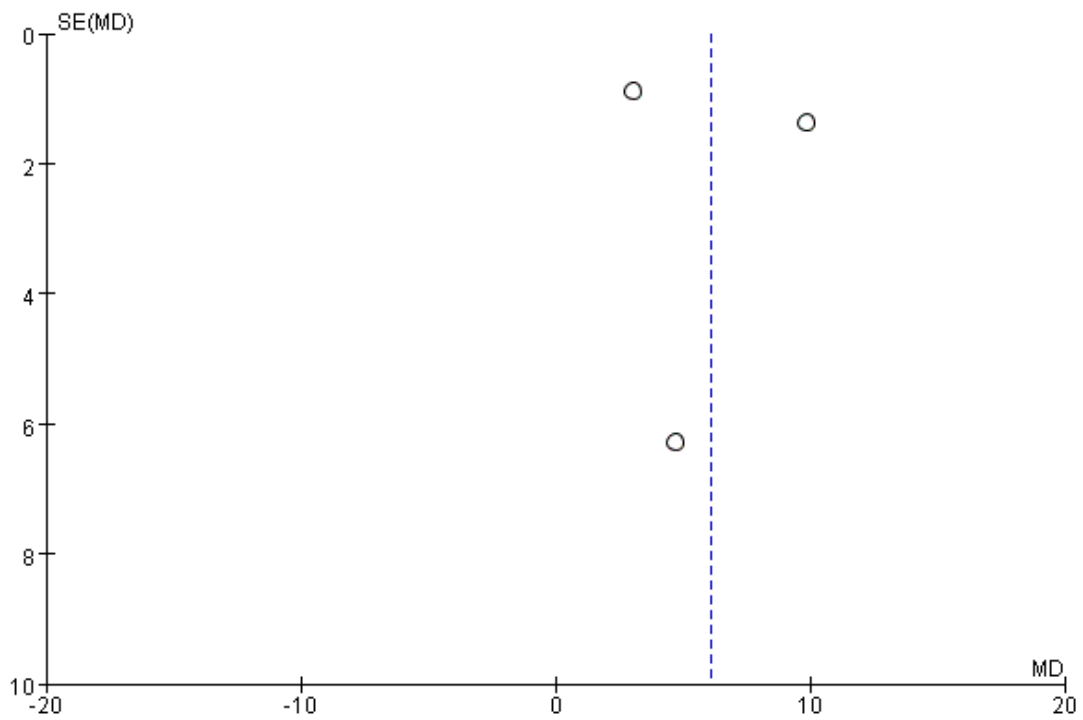

Supplementary Figure 8. Funnel plot of CRP in COPD patients with and without

bronchiectasis

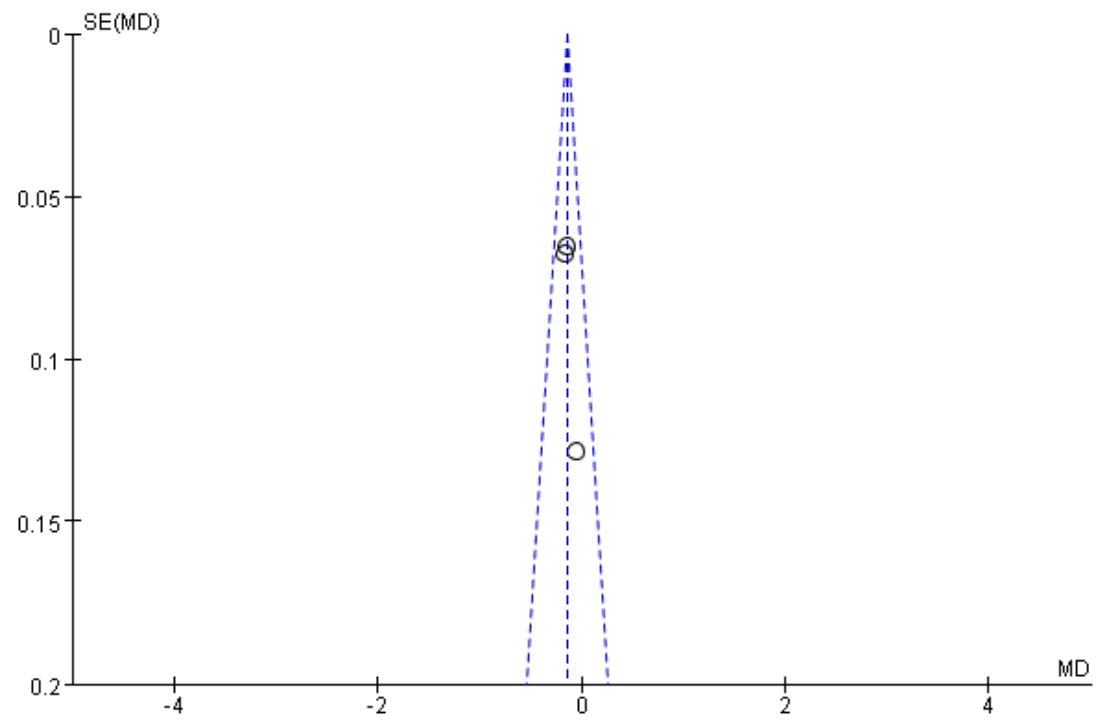

Supplementary Figure 9. Funnel plot of albumin in COPD patients with and without bronchiectasis

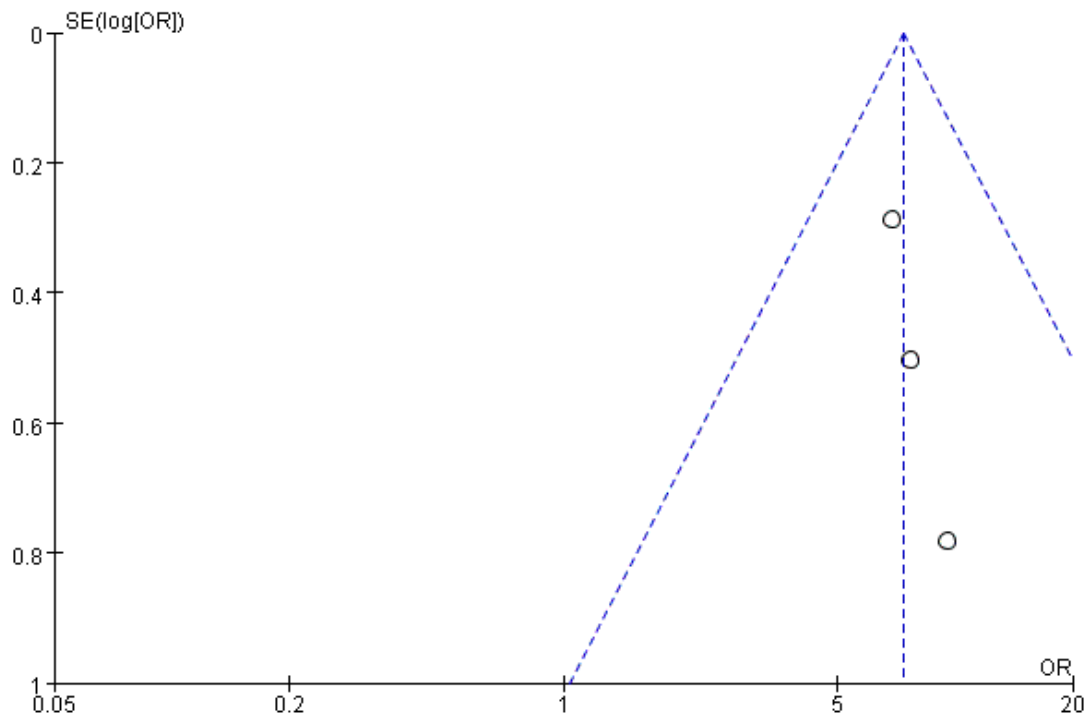

Supplementary Figure 10. Funnel plot of PPM chronic colonization in COPD patients with and without bronchiectasis

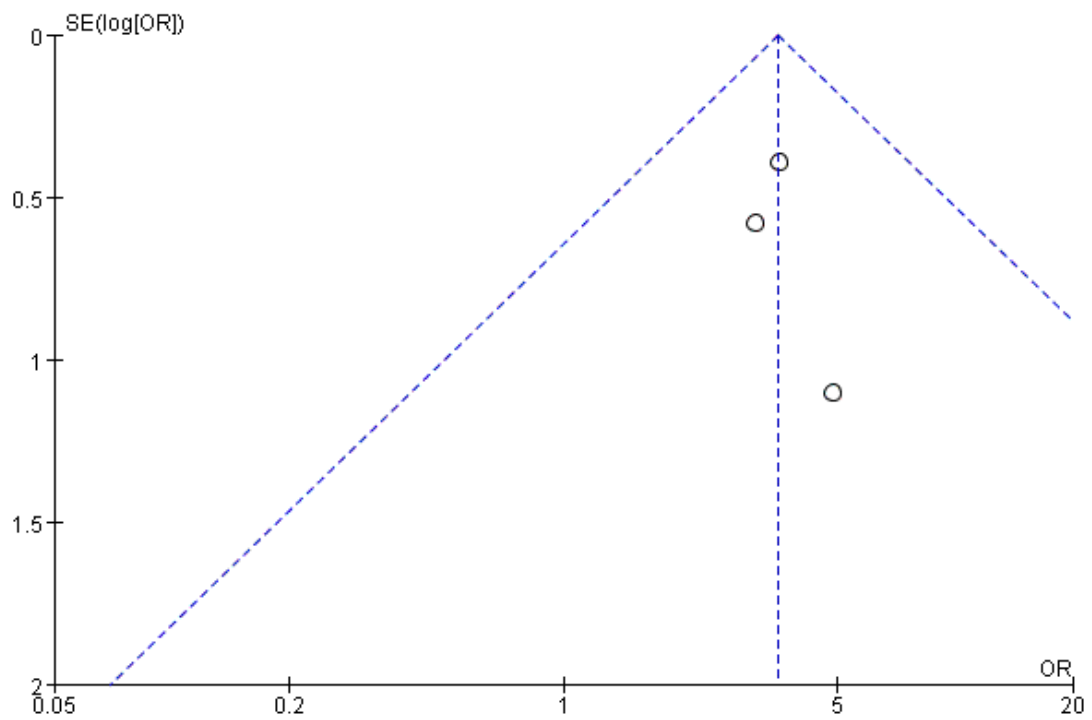

Supplementary Figure 11. Funnel plot of *P. aeruginosa* isolation rate in COPD patients with and without bronchiectasis

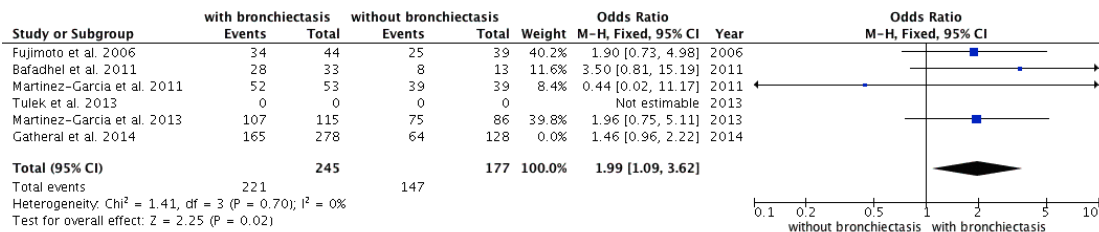

Supplementary Figure 12. Sensitivity analysis excluding Gatheral's study of mean difference of age in COPD patients with and without bronchiectasis.

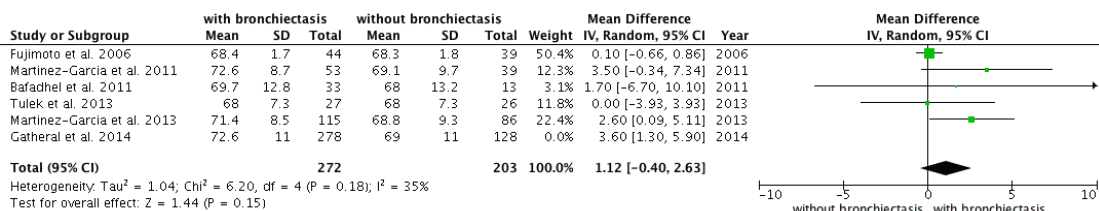

Supplementary Figure 13. Sensitivity analysis excluding Gatheral's study of odds ratio of gender in COPD patients with and without bronchiectasis.

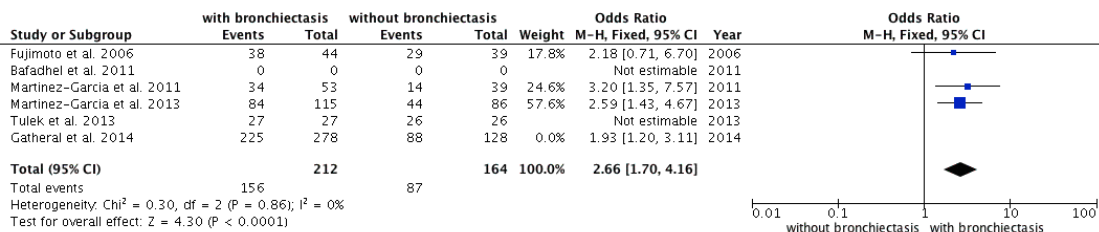

Supplementary Figure 14. Sensitivity analysis excluding Gatheral's study of odds ratio of daily sputum production in COPD patients with and without bronchiectasis.

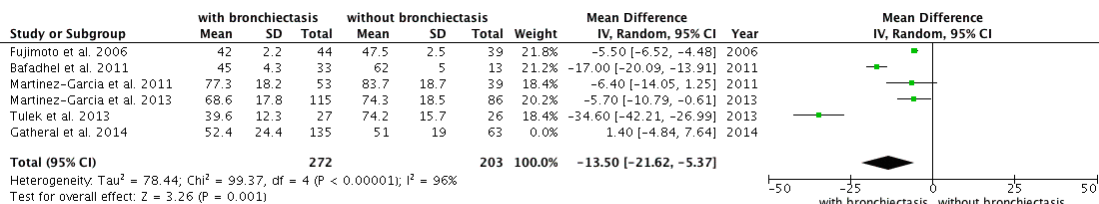

Supplementary Figure 15. Sensitivity analysis excluding Gatheral's study of mean difference of postbronchodilator FEV1% predicted in COPD patients with and without bronchiectasis.

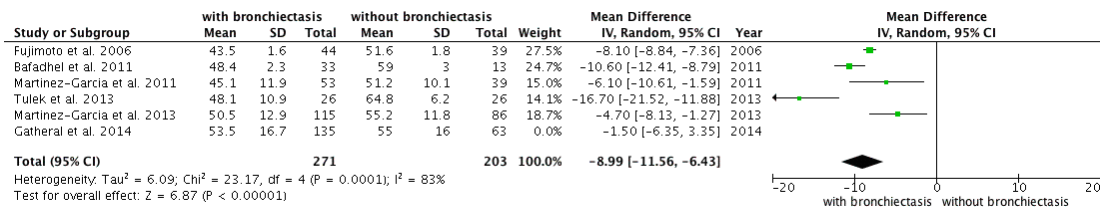

Supplementary Figure 16. Sensitivity analysis excluding Gatheral's study of mean difference of postbronchodilator FEV1/FVC% in COPD patients with and without bronchiectasis.

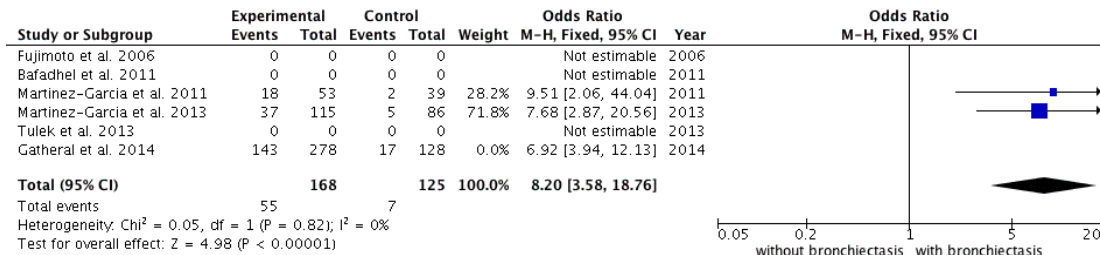

Supplementary Figure 17. Sensitivity analysis excluding Gatheral's study of odds ratio of PPM chronic colonization in COPD patients with and without bronchiectasis.

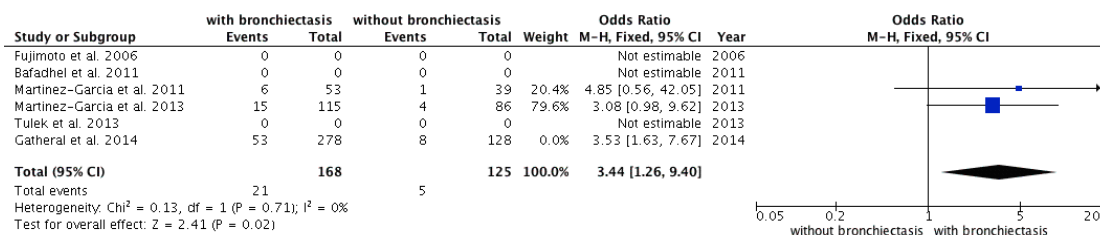

Supplementary Figure 18. Sensitivity analysis excluding Gatheral's study of odds ratio of *P. aeruginosa* isolation in COPD patients with and without bronchiectasis.
